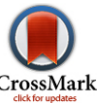

## Correction

# Correction: Diversified Expression of NG2/CSPG4 Isoforms in Glioblastoma and Human Foetal Brain Identifies Pericyte Subsets

The *PLOS ONE* Staff

## Notice of Republication

This article was republished on March 14, 2014, to replace Tables 1 and 2, which were originally published incorrectly. The publisher apologizes for these errors. Please download this article again to view the correct version.

## Reference

1. Girolamo F, Dallatmasina A, Rizzi M, Errede M, Wälchli T, et al. (2013) Diversified Expression of NG2/CSPG4 Isoforms in Glioblastoma and Human Foetal Brain Identifies Pericyte Subsets. *PLoS ONE* 8(12): e84883. doi:10.1371/journal.pone.0084883

**Citation:** The *PLOS ONE* Staff (2014) Correction: Diversified Expression of NG2/CSPG4 Isoforms in Glioblastoma and Human Foetal Brain Identifies Pericyte Subsets. *PLoS ONE* 9(4): e95120. doi:10.1371/journal.pone.0095120

**Published:** April 9, 2014

**Copyright:** © 2014 The *PLOS ONE* Staff. This is an open-access article distributed under the terms of the Creative Commons Attribution License, which permits unrestricted use, distribution, and reproduction in any medium, provided the original author and source are credited.
